# Supplementary material
Source: PubMed Central journal article supplement (PMC2720731)
Supplement: djn304_4.pdf [file djn304_4.pdf]

**Supplementary Table 1: Clinical and pathologic data for control and cancer patients of the testing set (n=248)**

|                                                    | No. of Cases | Gender |    | Mean Age±STDEV |
|----------------------------------------------------|--------------|--------|----|----------------|
|                                                    |              | F      | M  |                |
| <b>Controls</b>                                    | 148          | 83     | 65 | 66.17±11.21    |
| Healthy individuals                                | 92           | 50     | 42 | 64.97±10.42    |
| Benign disorders                                   | 56           | 33     | 23 | 67.68±11.94    |
| Urine incontinence                                 | 27           | 21     | 6  | 67.34±12.81    |
| BPH*                                               | 10           | 0      | 10 | 71.40±7.79     |
| Kidney stone                                       | 8            | 4      | 4  | 60.5±12.17     |
| Neurogenic bladder                                 | 5            | 5      | 0  | 55.00±11.60    |
| Chronic renal failure                              | 2            | 1      | 1  |                |
| Hydroureter                                        | 2            | 1      | 1  |                |
| Cystitis                                           | 1            | 1      | 0  |                |
| Proteinuria                                        | 1            | 0      | 1  |                |
| <b>Tumor patients</b>                              | 100          | 16     | 84 | 68.07±11.46    |
| LGPTCC (grade 1 and 2)                             | 37           | 7      | 30 | 66.97±12.01    |
| HGIN/CIS**                                         | 5            | 1      | 4  | 68.33±8.43     |
| HGPTCC (grade 3)                                   | 7            | 0      | 7  | 65.50±8.69     |
| HGNPTCC (grade 3)                                  | 51           | 8      | 43 | 69.12±11.41    |
| Superficial TCC (T <sub>a</sub> -T <sub>1a</sub> ) | 49           | 8      | 41 | 66.95±11.12    |
| Invasive TCC (T <sub>1b</sub> -higher)             | 51           | 8      | 43 | 69.12±11.41    |

\* BPH - benign prostatic hyperplasia

\*\* High-grade intraurothelial neoplasia/carcinoma *in situ*
