# Supplementary material
Source: PubMed Central journal article supplement (PMC2720731)
Supplement: djn304_5.pdf [file djn304_5.pdf]

**Supplementary Table 2: Summary of DNA ploidy, selected chromosomes copy numbers and aurora kinase A expression levels in bladder cancer cell lines.**

|         | Cell lines | DNA ploidy** | ≥4 chromosomes (%) |    |    | Expression of aurora kinase A** |
|---------|------------|--------------|--------------------|----|----|---------------------------------|
|         |            |              | 3                  | 7  | 17 |                                 |
| Group 1 | UC17       | 1.8          | 4                  | 0  | 4  | 0.22                            |
|         | UC6        | ND***        | 0                  | 6  | 8  | 0.53                            |
|         | UC9        | 2.1          | 2                  | 12 | 2  | 0.8                             |
|         | UC15       | 2.1          | 4                  | 12 | 18 | 0.89                            |
|         | UC1        | 3            | 10                 | 2  | 8  | 0.91                            |
|         | UC3        | 1.9          | 0                  | 0  | 0  | 0.94                            |
| Group 2 | UC14       | ND***        | 12                 | 10 | 0  | 2.03                            |
|         | UC18       | 1.9          | 4                  | 4  | 8  | 2.81                            |
|         | UC10       | 2.3          | 2                  | 4  | 10 | 3.03                            |
|         | UC13       | 2.4          | 0                  | 18 | 14 | 3.41                            |
| Group 3 | UC7        | 2.2          | 6                  | 12 | 20 | 6.82                            |
|         | UC2        | 2.2          | 22                 | 22 | 18 | 12.68                           |
|         | UC11       | 1.8          | 8                  | 12 | 26 | 13.13                           |

\* DNA ploidy is calculated as DNA index representing the ratio of the mean nuclear DNA content of the tumor cells to the mean nuclear DNA content of peripheral blood lymphocytes.

\*\* Relative expression of aurora kinase A revealed by quantitative RT-PCR.

\*\*\* Not done
