# Supplementary material
Source: PubMed Central journal article supplement (PMC2720731)
Supplement: djn304_6.pdf [file djn304_6.pdf]

## Supplementary Figures

**Supplementary Fig. 1.** Karyotyping, DNA ploidy analysis, and aurora kinase A expression in cultured normal human urothelial cells, NU204. **A)** Normal chromosomal complement (46xy) of NU204 cells from passage six. **B-D)** Diploid DNA distribution for passages 4, 6, and 8 of NU204 cells, respectively. **Insets** show similar expression levels of aurora A in passages 4, 6, and 8 of NU204 cells compared to normal urothelium obtained from human ureters.

**Supplementary Fig. 2.** Age distribution patterns for cohorts of healthy controls, patients with benign urological disorders, and patients with TCC in the testing set. **Inset** shows the proportions of low- and high-grade TCCs and superficial versus invasive TCCs in the testing set.

**Supplementary Fig. 3.** Quantitative FISH analysis of aurora kinase A gene copy number in voided urine specimens from testing set (n=248). **A)** Summary of quantitative FISH analysis of 148 controls consisting of healthy individuals (n=92) and patients with benign urologic disorders (n=56). **Inset** shows a FISH analysis of aurora A FISH probe on metaphyseal chromosomes from lymphocytes of human peripheral blood. **B)** Summary of quantitative FISH analysis of 100 voided urine samples from patients with TCC. Low-grade papillary TCC (LGPTCC); high-grade papillary TCC (HGPTCC); high-grade nonpapillary TCC (HGNPTCC); carcinoma *in situ*, high-grade intraurothelial neoplasia (HGIN).
