# Supplementary material
Source: PubMed Central journal article supplement (PMC2720731)

**A**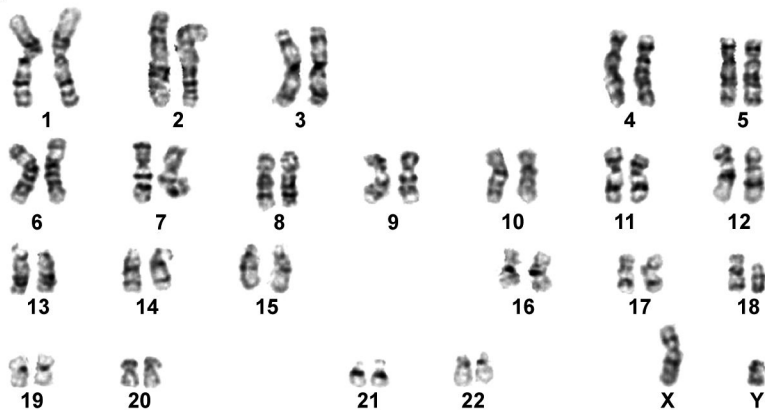**B**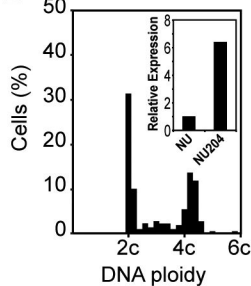**C**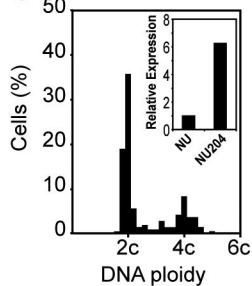**D**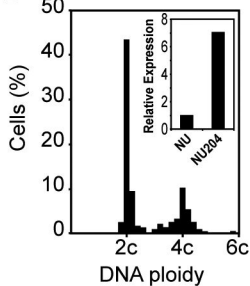

Supplement: djn304_1.pdf [file djn304_1.pdf]

Normal distribution

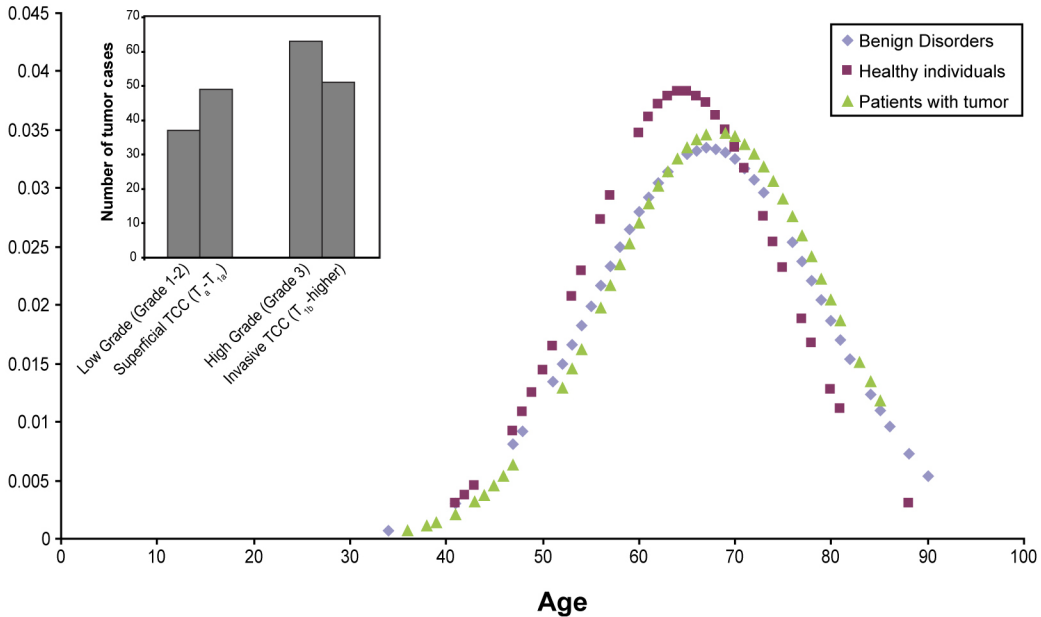

Supplement: djn304_2.pdf [file djn304_2.pdf]

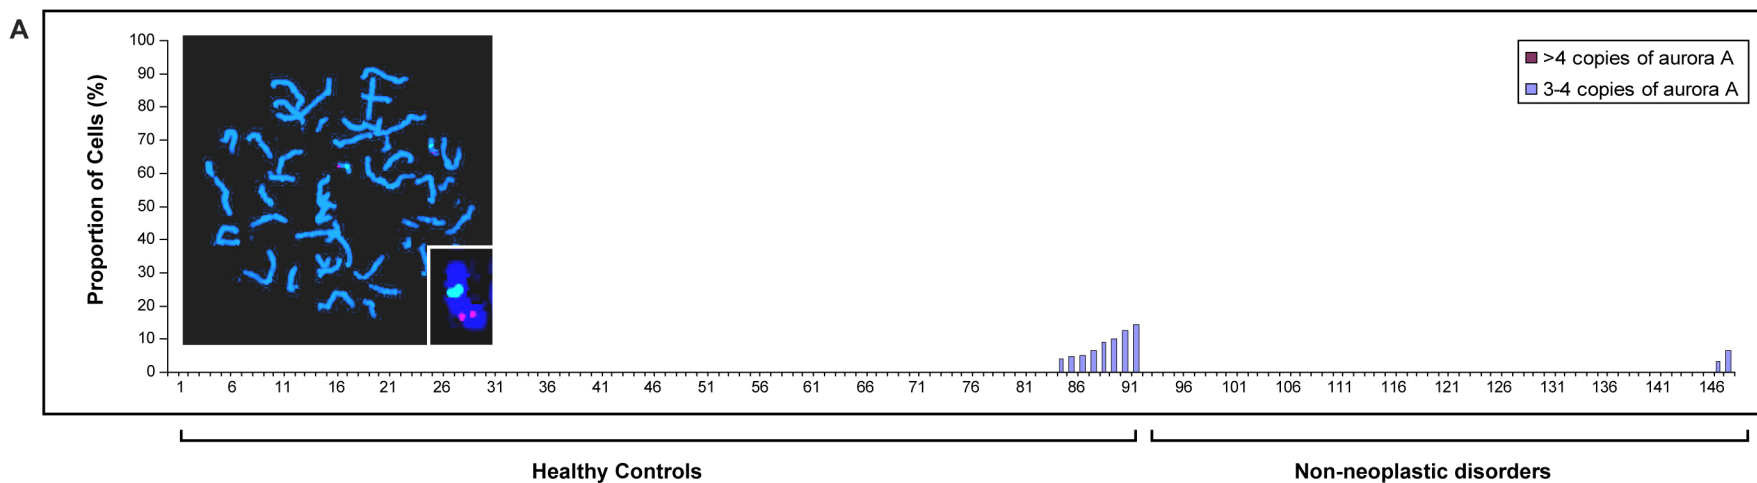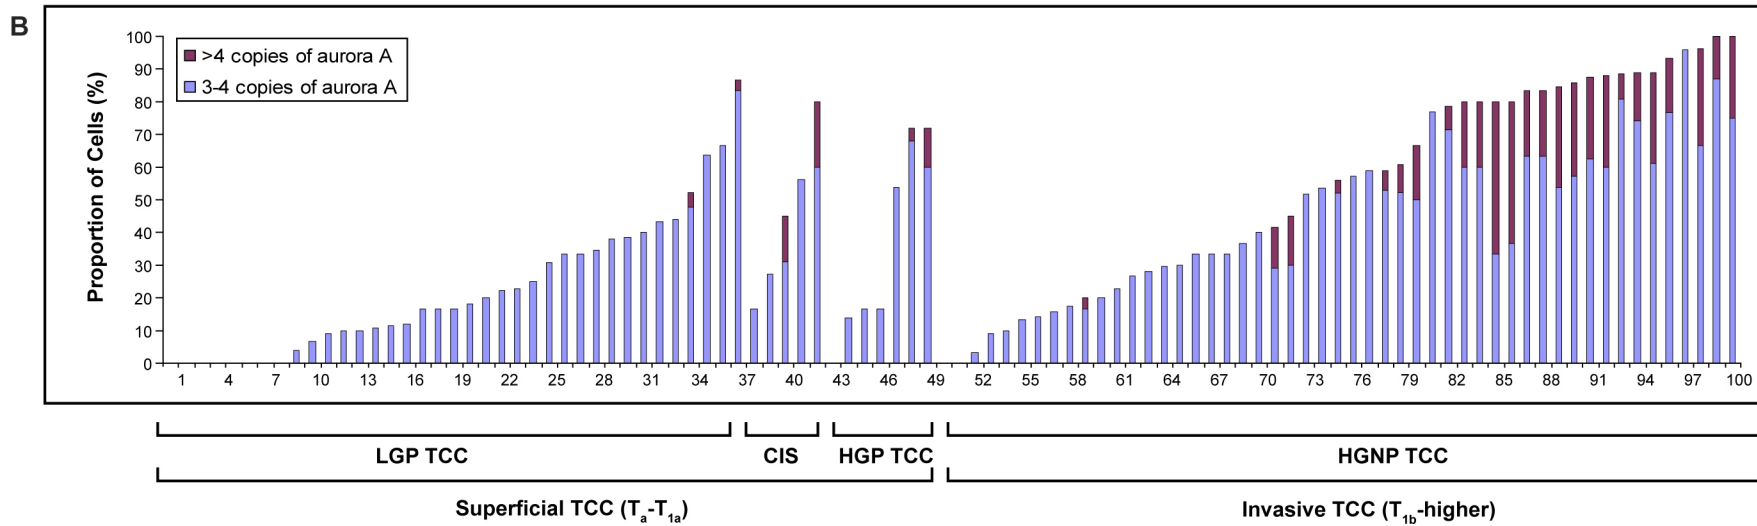

Supplement: djn304_3.pdf [file djn304_3.pdf]
